# Supplementary material
Source: HighWire-hosted journal article supplement (https://ajnr-sso.highwirestaging.com/highwire/filestream/95724/field_highwire_adjunct_files/0/0743.pdf)
Supplement: 0743.pdf [file 0743.pdf]

**Supplementary Table 1.** Clinical characteristics of patients with IPH on MRI

|                                                            | (n= 88)            |
|------------------------------------------------------------|--------------------|
| Age, mean in years ( $\pm$ SD)                             | 71.1 ( $\pm$ 7.3)  |
| Sex, male (%)                                              | 76 (86)            |
| BMI (kg/m <sup>2</sup> ) ( $\pm$ SD)                       | 26.2 ( $\pm$ 3.8)  |
| Degree of stenosis, mean percentage ( $\pm$ SD)            | 22.3 ( $\pm$ 17.6) |
| Range of degree of stenosis, min-max percentage            | 0 - 64             |
| Hypertension, yes (%)                                      | 57 (65)            |
| Hypercholesterolemia, yes (%)                              | 51 (58)            |
| Previous antiplatelet agent use, yes (%) <sup>a</sup>      | 44 (51)            |
| Previous antihypertensive use, yes (%) <sup>a</sup>        | 57 (66)            |
| Previous statin use, yes (%) <sup>a</sup>                  | 42 (48)            |
| Diabetes Mellitus, yes (%) <sup>b</sup>                    | 18 (21)            |
| Current smoking, yes (%) <sup>c</sup>                      | 12 (14)            |
| History of ischemic stroke, yes (%)                        | 23 (26)            |
| History of ischemic heart disease, yes (%)                 | 21 (24)            |
| History of peripheral artery disease, yes (%) <sup>c</sup> | 11 (13)            |

Data are presented as absolute number of patients (%), and mean  $\pm$  SD. <sup>a</sup> 1-missing data on previous antiplatelet use, previous antihypertensive use and previous statin use, <sup>b</sup> 2-missing data on diabetes

mellitus. <sup>c</sup> 3-missing data about current smoking status and history of peripheral artery disease.

IPH=intraplaque hemorrhage, SD = standard deviation, BMI=Body Mass Index

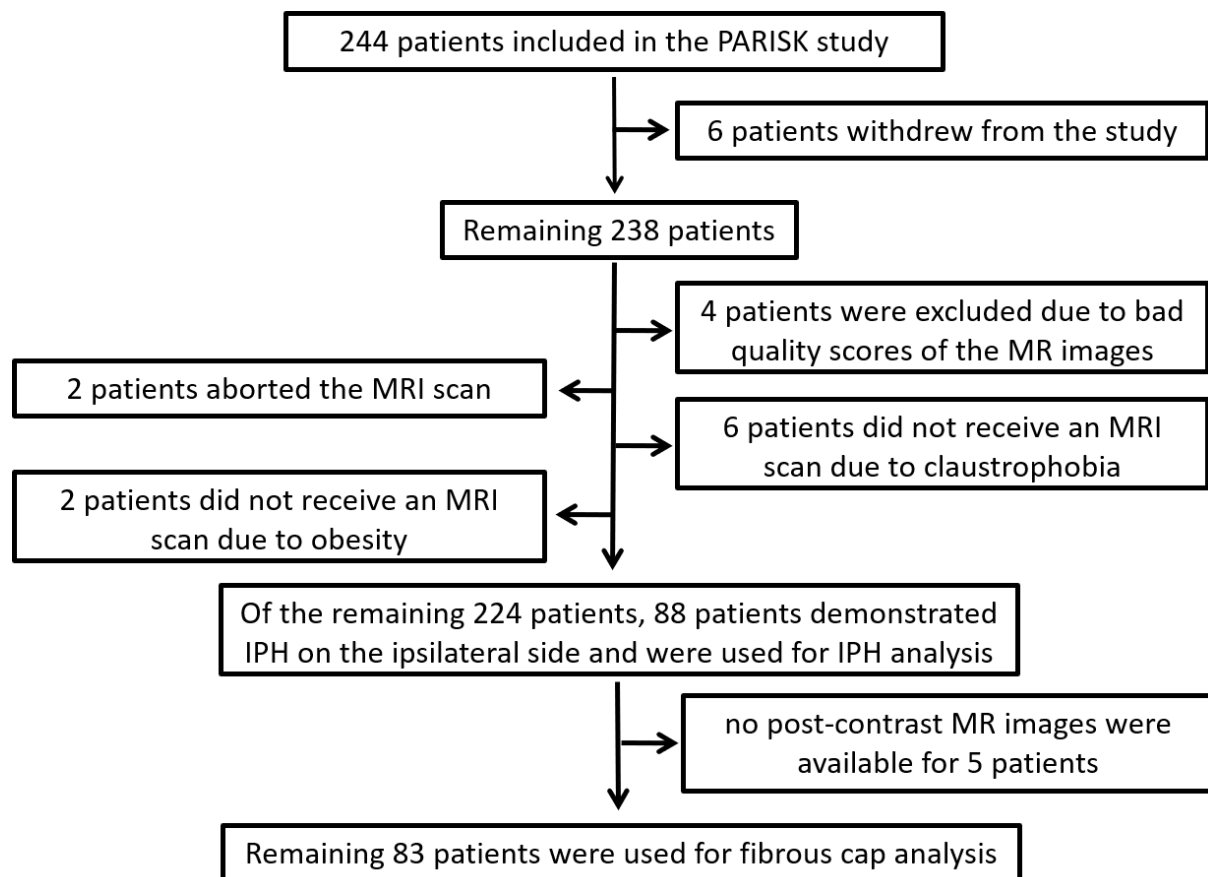

**Supplementary Figure 1.** Patient selection flowchart
